# Supplementary material
Source: PubMed Central journal article supplement (PMC1449671)

**Bright Field**   **Rhodamine**   **DAPI**   **Merge**

Naïve  
Anti-CrNFκB

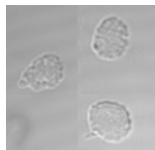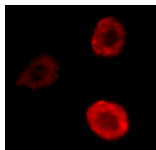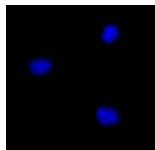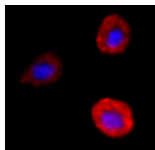

Challenged  
Anti-CrNFκB

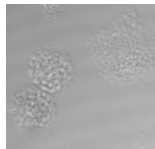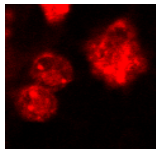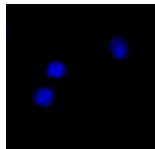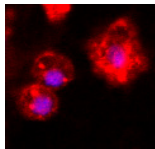

Naïve  
Anti-CrIκB

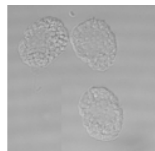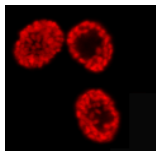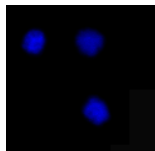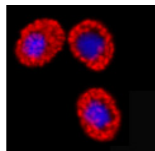

Challenged  
Anti-CrIκB

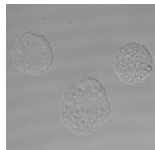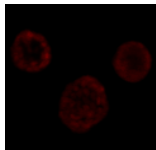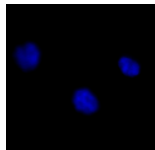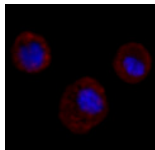

Supplement: pnas_0507044103_5.pdf [file pnas_0507044103_5.pdf]
