# Supplementary material
Source: PubMed Central journal article supplement (PMC1449671)
Supplement: pnas_0507044103_1.pdf [file pnas_0507044103_1.pdf]

### DNA binding motif

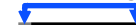

**CrNFκB** 1: -MDSVSVHVTSKMVP-----TTPTPYVRIVEQPASRALRFRYECEGRSAGSIPGANSTAECKTYPT  
**DmDorsal** 1: MFPNQNGAAGPGQGF--AVDGGQSLNYNGLPAQQQQQLAQSTKNVRKKPYVKITEQPAGKALRFRYECEGRSAGSIPGVNSTPENKTYPT  
**AgGambif** 1: -MAGYVNGADAAPFTEIEGILGESDLLDDI IHVIGKDIRREEMPVVPNQRPFYVEITEQHPKALRFRYECEGRSAGSIPGVNITAEQKTFPS

**CrNFκB** 61: IQV VNYKGS AVVVVSCVTKEGPFPRPHPHNLVGREGCKKGICTMVINNHDMTCSFSSLGIQCVRKDI EESLKLREMIKVDPYRTGFDHR  
**DmDorsal** 89: I E I VGYKGR AVVVVSCVTRDTP- YRPHPHNLVGREGCKKGVCTEINSETMRAVFSNLGIQCVKKDI EAALKAREEIRVDPFKTGFSHR  
**AgGambif** 90: IQVHG YRGR AVVVVSCVTKEGPEHKPHPHNLVGREGCKKGVCTEINSTTMSYTFNNLGIQCVKKDI VEALRLRQETRVDPFRTGFGHA

### Rel Homology Domain 1

**CrNFκB** 151: LOTSNIIDLNVVRLCFQVFL EGPQQGKYIVPLPPVVSDFIFDKKAI CEETINKLSHYSA P VCGSEVILLCDKVAKDDIKVRFYEEERAGRV  
**DmDorsal** 178: FOPSSIDLNSVRLCFQVFM ESECKGRFTSPLPPVVSDFIFDKKAMSDLVICRLCSCSATVFGNTQIILLCEKVAKEDI SVRFYEEKNGQS  
**AgGambif** 180: KEPGSIIDLNAVRLCFQVFL EGOQRGRFTSPLPPVVSDFIHYDKKAMSDLVICRLSDCTAPVSGKEIILLCEKVKVDEIKVRFYEEKGNAT

**CrNFκB** 241: EWESFGEFHPNEVHKQVAIPFRTPRYRDENVQCHIPVFTQLMRPSDGSSSDPRPFOLLPPVNRDPEGLSRKRQKIEDG-----  
**DmDorsal** 268: WBEAFGDFQHTDVHKQVAITFFKTPRYHTLDITEPAKVFTQLRRPSDGVTS EALPFEYVPMDS PAHLRKRKQKTTGGD-----  
**AgGambif** 270: VWENMAEF SHTDVHKQVAISFRTEPPYRTDIDISDEVRV FVQLERPSDNTYSEARDFQFTPLDIT--VDLRRKRQKLTGSSNVFLPVVTAPLP

### Rel Homology Domain 2

### NLS

**CrNFκB** 318: -----CLDRFLKENIFGAARDAGGPLTP-----HTIPRTIKQATRIVLKPETVLEGKSNMPPELFLQ-----ESQL  
**DmDorsal** 345: ----PMHLLQQQKQQLQNDHQDGRQTMNM----CWNTQNIPIKTEPRDTSQPQFGLSYRAPPELTPSPQPLSPSSNYNHNSTSPY  
**AgGambif** 358: GPSPPSSLGMPGNIPNLSQLDATGGQSASTSGLPRGIYTYHNASAFQMPKKEIKNEPGDSPSHNPSNQYQLPMQP-MFTAQSTS PGD

**CrNFκB** 379: PHLPVFTP-----ELRACAT--SGGVVTVGVASTVTTCSGLSATSIVEHLDVRG-----  
**DmDorsal** 426: NMASAVTPTNGQQQLMSPNHP----QQQQQQQYCAT--DLGSNYNPFQQVLAQQQHQHQHQHQHQ--QQQQQQQQQQQ  
**AgGambif** 447: RSPATLTPSPGIGGPI SPLDPGNVTPPPAYTTLGGTGGTMGNLFGQFGTGFSAATQPNASVPMFTNLPGPSNGWQVPVPSHTQNGPS

### Polyglutamine, polyalanine or polyasparagine region

**CrNFκB** 426: LCSPPFYPI-----TLLSTASSQDILAIATKQVS-----SIPKSEPSVVLGHQSAEMSLEETTEKLDLSDLG--EPLDIIQILDYGET  
**DmDorsal** 507: QSLQFHANPFGNPGGNSWESKFSAAA VAAAAATG AAPANGNSNNLSN LNNPFTMHNLLTSGGGPGNANNLQWNLT TNHLLHQHTLHCQ  
**AgGambif** 537: QPQPQQQNPFNLLNFGILPLATGDPLMAMSTANTN----NQPNVGGPPLGSDFYMNLDLANLDPVFNSSERSVLGLSLSTLNLNRLEOT

**CrNFκB** 502: GNLS--LNLSQLSFLDSGNLNPVSNMLVATSV DYMNSTNS-----FSFLQNELETLN-----VLCKSRSTNEST-----  
**DmDorsal** 597: QQQQQQQQYDNTAPTNNNANNNNNNNNTAGNQADNNGPTLSNLLSFDLGLVHNLNSEDQIILRLNSEDLQISNLSIST  
**AgGambif** 622: ANVQTSGGN-YQQHSA SNQQQAIKALLATQQLQ-QQQQQQQQQQQQQQGGVGGADRINDDED--LTD SFTKLS TNDLN---
