# Supplementary material
Source: PubMed Central journal article supplement (PMC1449671)
Supplement: pnas_0507044103_2.pdf [file pnas_0507044103_2.pdf]

CrRelish 1 :-----MAYACQCFPATREQNEGTISFFINPFQCPVKGRYMPSPMCEPISLLLEEQETPGLSAI  
Human p100 1 :-----MESCYNPGLDGI  
DmRelish 1 :MNMNQYYDLNKGKVMFMNDASSTSGYSSSISENSTNRSFSPAHSPKTMEQLQTFANLNIPCGNSPHQPEMANSFYQNOLE

CrRelish 62 :VSDCVSMSNTESSFQHSFPITITNCSPASPLOPTTPMAQVGVSSSPPLHQIQNCISPSISPHEIHTLQPPCPDHPVLSVL  
Human p100 13 :IEYDD-----FKLNSIIVEKEP-----APETADGPVIVIV  
DmRelish 81 :LNNGGICQLGATNLINSTGVSFGVANVTSFGNMYMDHQYFVPAPATVPPSQNFC-----YHONGLASDGIKHVQQRIV

**DNA binding motif**

CrRelish 142 :EQPTNR-IRYRYKSEKG-SHGGLTGEFSSSSKKTYPYTKLENYRPNQNOVFIKATLYTVDDQOKPHEVHKLMGKHCQDG-V  
Human p100 44 :EQPKORGEFRFRYGCGBP-SHGGLPGASSEKGRKTYPTVKICNYE-----PAKIEVDLVTHSPPRAHAHSLVKGKQSELGI  
DmRelish 156 :EQPVEK-RRFRYKSEMHGTHGSLNCGANSKRTPKTFEVEVTLQNYDC-----PAVIRCSLEFQTN-LDSPHSQHLVVRKDDRDCV

**Rel Homology Domain 1 (RHD)**

CrRelish 295 :KIRFEAFAVS-QGHLYPICDAVFSNIITANOKCPDVGELKTIKMKRCSGVCTGSDVEVLLCEKVNKKDVKVIFFEEDENGM  
Human p100 191 :RLRFSAFLRASDGSFSLPLKPVITSOPIHDSKSEGASNLIKISRMDKTAGSVRGGDEVYLLCDKVKOKDIEVRFYEDDEN--  
DmRelish 306 :RLCFEAFKTEEDNGAVVPLAPPVYSNAINNRKSAQTGELRIVRLSKPTGGVMCNDLILLVBEKVSCKNIKVRFFEEDEDEGE

CrRelish 374 :IQWQDFGSFTEADVHHOVAIVFKTPPYRDLMIKQPVKVKLQLYRYRDGECSSKPKDFVYFPIHDHRRDGETERKRKLNQCCN  
Human p100 269 :-GWQAFGDFSPPTDVHKQVAIVFRTPPYHKMKIERPVTVLQLKRRKRGDVSQKQETIYYPVEDKEEVQRKRKALPFTS  
DmRelish 386 :TVWYAYAKRESVDVHHOVAIVCQTPPYKDKVIDRVEVNVVLELIRPSDDERSFF--ALPFRYKPRSVIVSRKRRTGSSAN

**Rel Homology Domain 2 (IPT)** **NLS**

CrRelish 454 :FSGFDGEYFRSTQSFQFSGSGSSGIRNTSFYDHDQDSVGFQSKKMLNASQKQTEVRTFNLKDRQGNVETVKGPEPSG  
Human p100 348 :QP-FGGGSHMGGGSGCAAQGYG-----AGCGGSLGFFPSLAYSPOSS-----AGPMRCMPGGG  
DmRelish 464 :SSSSCTESNNSLDLPKTLCLAQP-----PNGLPNLSQHDQITISEEFGREKHLNEFTASED-----

CrRelish 534 :STDGKWEVNNNQELPSDKSVSTDKPLENSFDRLCISKLKEEDENTNVSKSRNSRSEILCKSTLAAQVQNKRANATK  
Human p100 403 :RVCADPALDRHGDSAMHLALRACAG--APELRLALLOSCAPAVPQLLHMPDFEGTYFVHLAVRARSPECIDLLVDSG-  
DmRelish 520 :-----FRKLEHNSSD-----

CrRelish 614 :TKCTELHMS TSC ESTQCDLELNSRTELSYBQNNVFPDPTAQDYQNKIKSSGPPWLVEKLALRMSLSGREFVCSGDLAK  
Human p100 413 :-----SRDSGEEAAEPSAPSRTPQCEPCAPPEMLQARAREYNARLFLGAAHAAP-----SPTRLLRHRGRRR  
DmRelish 531 :-----LQKICQLDMGELCHDGHNRAEVSHRNRITIKCLDDLFEIYKQDRISP-----IKISHHKVEK

CrRelish 694 :ILNMTMHLVAIQDSNCDNLEHLAMTHHSGSCADHLELVRCILNALKEETRDATNQCNNIKOTPLMLAVLTRNPYVVOELL  
Human p100 472 :LLAQQRHLTAQDENGDIPHLALIHG---QTSVLEQIVYVIHHAQDIG--VVMLTNHLHOTPLHLAVITGQTSVVSFLL  
DmRelish 588 :WFLTEH---ALNNVNRDITLLHEVLSHK--KDKKLALQTIQVMNYFNLKDVVNSTLNADGDSALHVAQCQDRAHYIRPLL

**Ankyrin repeat 1** **Ankyrin repeat 2**

CrRelish 774 :FHGANLNVADAEGNTPLHIAIQIDDYCTISILLDSKMYEAQOSPISPNLNALNNACYAALHLAVRHNSDCVMVLCARG-  
Human p100 547 :RVCADPALDRHGDSAMHLALRACAG--APELRLALLOSCAPAVPQLLHMPDFEGTYFVHLAVRARSPECIDLLVDSG-  
DmRelish 662 :MGCGNPNLKNNAGNTPLHVAVKEEHLSCVESFLN-----GVPTVQLDLSITINDDGLTPLHMAIRONKYDVAKKLSYDR

**Ankyrin repeat 3** **Ankyrin repeat 4**

CrRelish 853 :ADINVMMDGTSCHTPLHLAVWNPQ-IVQFTTKISHVNNI---VQNFAGNTPLHLCAHRLENVVRILINAHANPLVENVY  
Human p100 623 :AEVEATERQGRRTALHLATEMEELGLVTHLVTKLRANVN---ARTFAGNTPLHLAAGLGYPTLIRLLKACADIHAENE  
DmRelish 736 :TSISVANMTMDCNNALHMAVLEQSVLELVLLIDAQENLTDILOAONAGHTPLELAEERKANDRVVOLLKVVYP---EKGE

**Ankyrin repeat 5** **Ankyrin repeat 6**

CrRelish 928 :DVYS---SSKRHERDIEVLKNGKGPLDFACNK-KQLRCILAGIVTSPKAKSODLKSSFSISKPSHSSSTHNDKKV---  
Human p100 699 :EPLCPLPSPPTSDDSDSEGPEKDIRSSFRGHTPLDLTSTLVKTLILNAAONTMEPPLTPPSPAGPGLSLGDTALQNL  
DmRelish 813 :LMTWVLECKVKEEDSSDESSDAGOLEIKSEE-----MDIETKDEDSVLELDLSSGPRRQKDESRDTEMD---

CrRelish 1001 :--RKRSEDIKYSQKHHLENEHSTNKEAVSN-----EFIFDSCGYASCEIKTEDKNRMDHLCTKLDKQKQWKQGM  
Human p100 779 :QLLDGPEAQGSWAELAEERGLRSIVD TYRQTISPSGSLRSYELAGGDLCLEALSMDMGEQVRLRGPTRDKLPST  
DmRelish 879 :-----NNKQLLKNKFFVDRLCSILN-----QPLGHGSDP-----QNRKMWQLARQTHLQKFAFI

CrRelish 1073 :LGFENSVINSLERLCGKEKSPAKIIDRFIQE---NPDCLMKTAKNAVVAELOEPLVLIQMTIEV-----  
Human p100 859 :EVKEDSAYGSSQVEQAEKLGPPPEPPGGSHGHQPQVTDLLPAPSPLPGPPVQRPHLEQLIFNTPHPPLSWDK  
DmRelish 930 :WLAGEDLLDHWKRGASVEFSTFAR-----ALQAVDEQAVALLVNP-----

**Death Domain**
