# Supplementary material
Source: PubMed Central journal article supplement (PMC1449671)
Supplement: pnas_0507044103_3.pdf [file pnas_0507044103_3.pdf]

CrIkB 1: -----MRKSKEFKVSSSEKEKSSVPHKQGGHVRSEGTRSVVSSHSHHSFQKEYKIGYKRTMVSNQVLCDENECSSIS  
 DmCactus 1: MPSPTKAAEAATKATATSDCSCSAASVPEQRAPSNAAAN-----PSSSLATSGKIGGKIQDQTAAINKQKEFAV  
 Human IkB $\alpha$  1: -----MFQAAE-----RPQEWAMEGPRDC-----LKKERL

CrIkB 74: YETVFDSCYSSSTSFQSSSSIIQGDNAFFDSGMSIGTSELGIHFPEHEYFIDSDFKKE---SE-----  
 DmCactus 68: PNETSDSGHISGPGQ---SSQIFSEETVDPDSEEDQDKDQESAPQKEQPVVLDSGTIIDEEDDEEKEKEEHQDTTATADS  
 Human IkB $\alpha$  26: LDRHDSGLDSMK-----D---EE-----YEQMVKELQETRLR---POE-----

**Serine rich region**

CrIkB 133: -----TKCGDVDVCTKFDSSGLGTELGSDVDNALYSKEK-----TTLTPHLSETVVEDFQWQSAF  
 DmCactus 145: MRLKHSADTGIPQWTVESHVLSRGEQLNNGQSSSTQITGRSKVQSSTASTGNANPSGSGATSSAPPSINIMNAWQOFY  
 Human IkB $\alpha$  59: -----VPRG-----SEF-----WKQQL

CrIkB 187: HODQDGTLLHLALVQETVEISLALVRFAM-HEDMLDIFNHLSQTPLHLAVLTGQYRIVRRLLVAGATVDMRDRHGNTAF  
 DmCactus 225: QONDGDGTFPLHLACTSGSVDVVAALIRMAP-HPCLLNIQNDVAQTPLHLAALTAQPNIMRILLLAGAEEFVDRDRHGNTAL  
 Human IkB $\alpha$  71: TE--DGDSFLHLALIHEEKALTMEVIRQVKGDLAFLNFONNLQQTPLHLAVITNQPEIAEALLGAGCDPELRDFRGNTPL

**Ankyrin repeat 1**

**Ankyrin repeat 2**

CrIkB 266: HIACERGDMECLRALTTPVTENEVIEANLQYP-----VDLQYLSPDFLEHRNYEGQTCLLHLAVQGHMDVIRYLVO  
 DmCactus 304: HLSCIAGEKQCVRALTEKFGATEIHEAHRQYGHRSNDKAVSLSYACLPADELRNYDGERCVHLAAEACHIDILRLVLS  
 Human IkB $\alpha$  149: HLACEQGCCLASVGLTQ-----SCITPHLHSLKATNRYNGHTCLHLASIHGYLGVLELVS

**Ankyrin repeat 3**

**Ankyrin repeat 4**

CrIkB 337: CDADVNGKEGKSGRTSLHLAVEAQRDDLQVQLLNTCHADVN-IQNYAGHSLHVAVSWYQLEPTCSKLNIVIIILKNHGG  
 DmCactus 384: HGADINAREGKSGRTPLHIAIEGCNEDLANFLLECEKLNLETATYAGLTAYCFACIWNKSR-----MONILEKRCA  
 Human IkB $\alpha$  205: LGADVNAQEPNCGRTALHLAVDLQNPDLVSLLLKCGADVNV--RVTYQGYSPYQLTWGRPSTR-----IQQQLGQLTL

**Ankyrin repeat 5**

CrIkB 416: EPRRPPESDVDS--DSDSSGDEVRAV-----  
 DmCactus 456: ETVTTPPD---S-DYDSSDIEDLDDTKMYDRFGDPRYFVSYNGGNPMTVA  
 Human IkB $\alpha$  275: ENIQMLPE---SEDEESYDTSEFTEFTEDELPE---YDDCVFGGQRLTL-

**Pest domain**
