# Supplementary material
Source: PubMed Central journal article supplement (PMC1449671)

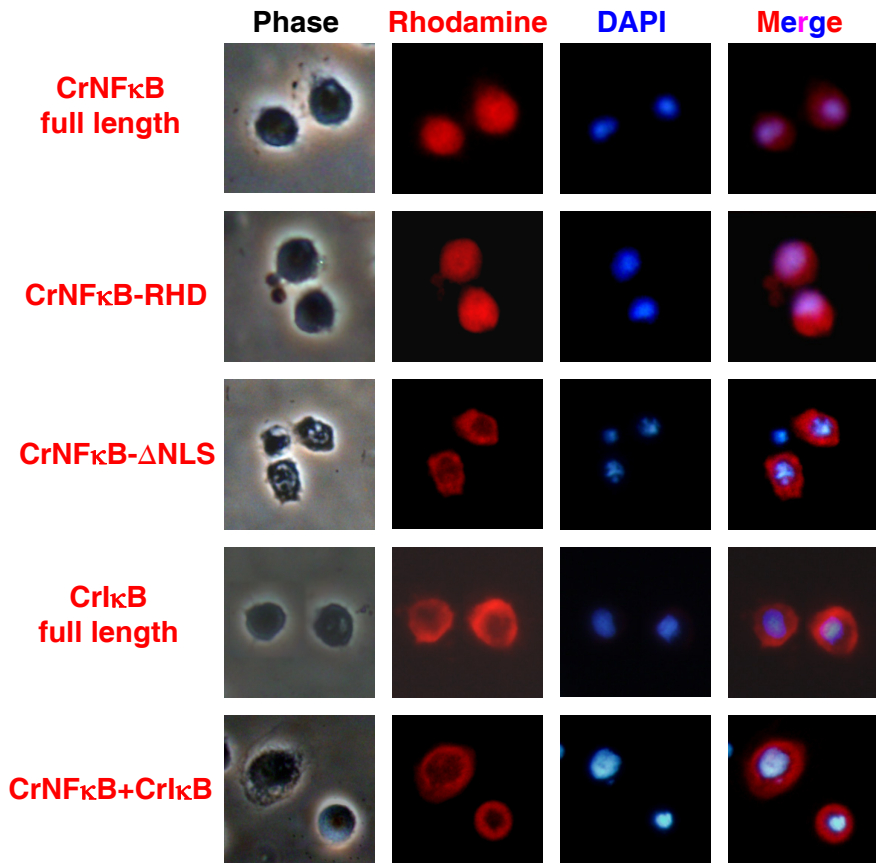

Supplement: pnas_0507044103_4.pdf [file pnas_0507044103_4.pdf]
